# Supplementary material for: Forced topochemistry of a solid-state Diels–Alder reaction by encapsulation in epoxy glue
Source: Royal Society of Chemistry journal article supplement (doi:10.1039/d3ce00388d), 2023-01-01
Supplement: d3ce00388d1.pdf [file d3ce00388d1.pdf]

Supplementary information for:

## Forced topochemistry of a solid-state Diels-Alder reaction by encapsulation in epoxy glue

T. A. Lau, S. Khorasani, and M. A. Fernandes\*

*Molecular Sciences Institute, School of Chemistry, University of the Witwatersrand, PO Wits 2050, Johannesburg, South Africa. Tel: +27-11-7176723; Fax: +27-11-7176749; E-mail: Manuel.Fernandes@wits.ac.za.*

### 1. Supplementary information associated with the results and discussion

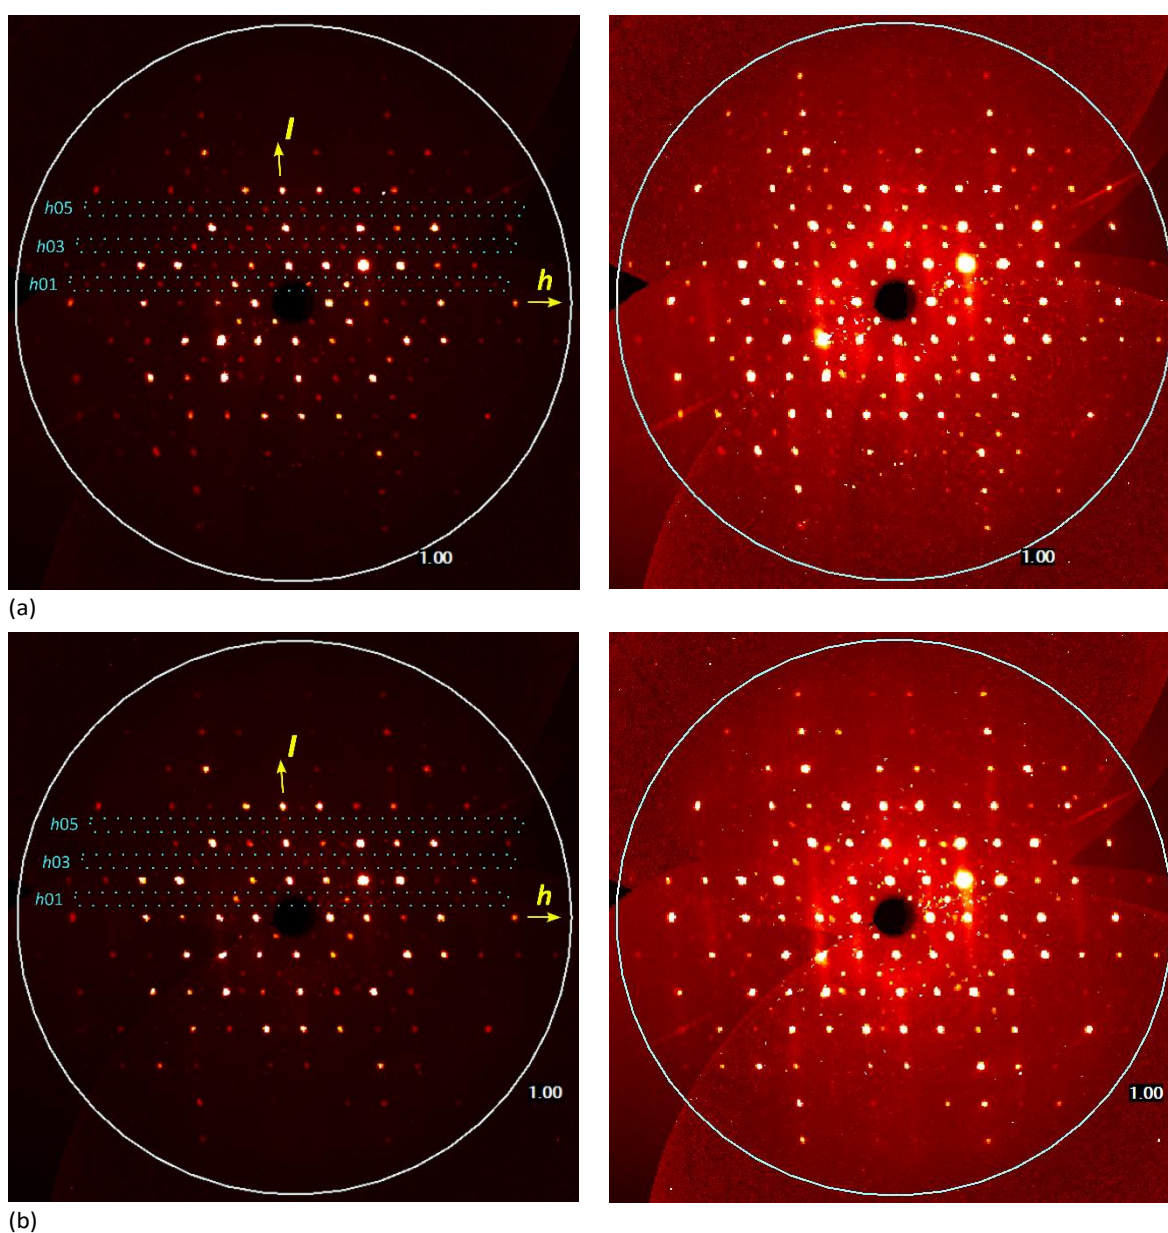

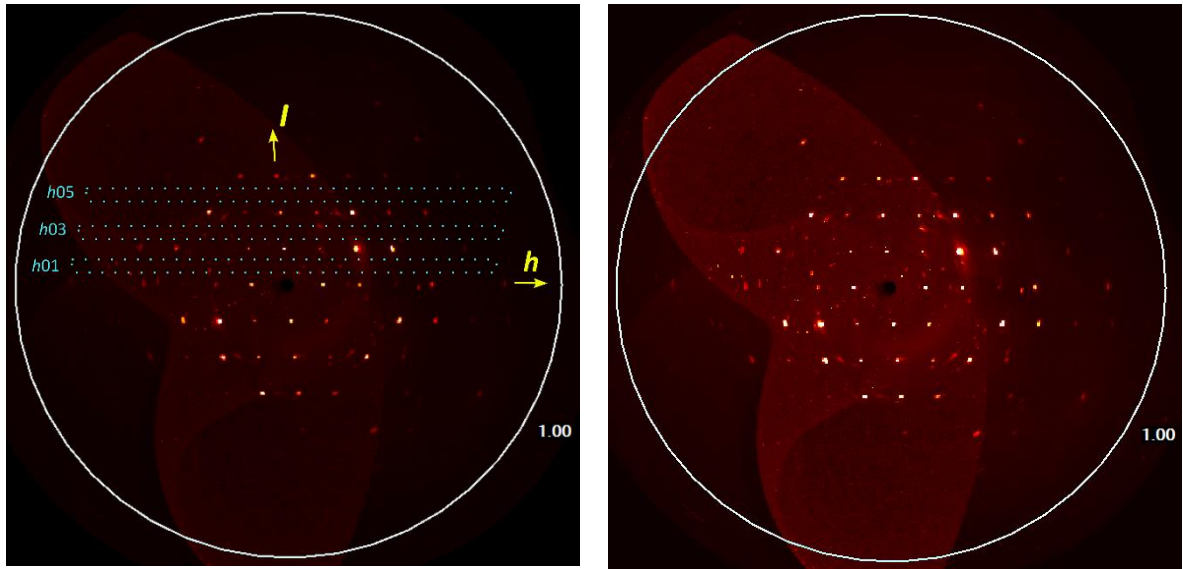

(c)

Fig. S1. Pseudo  $[h0l]$  precession images for (a) the room temperature reacted crystal at 64% (just before unit cell transformation), and after the  $P-1$  to  $C2/c$  transformation at (b) 79% and (c) 89% conversion. The  $[h01]$ ,  $[h03]$ , and  $[h05]$  reflections enclosed in dotted lines are allowed in the triclinic  $P-1$  space group (a) but are weaker in (b) and absent in (c) as required for  $C2/c$ . The right and left image are the same image by at differing intensity contrasts.

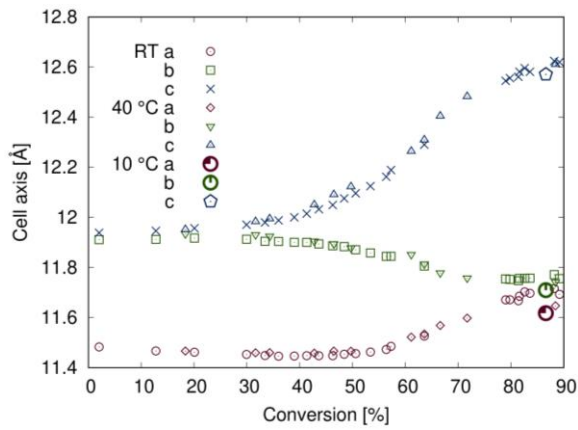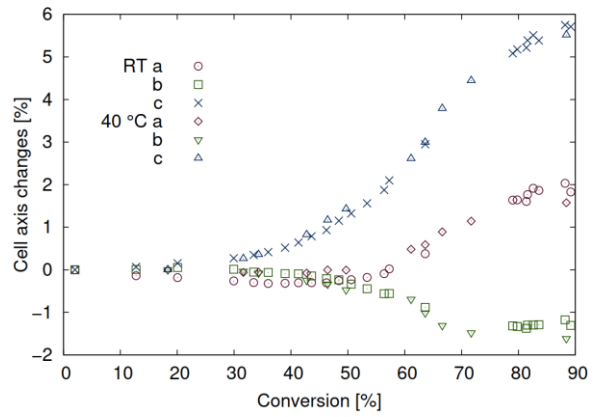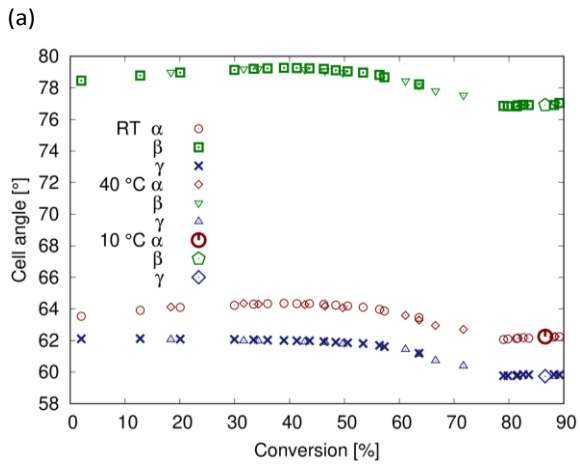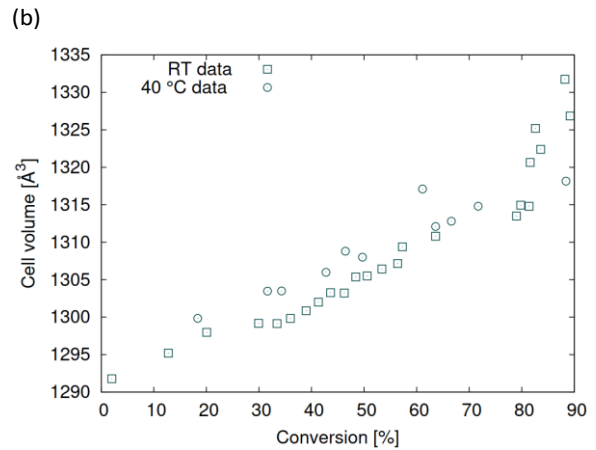

(a)

(b)

Fig. S2. Changes in the unit cell parameters for epoxy encapsulated crystals during the reaction at room temperature (20 °C) and at 40 °C. (a) Changes in unit cell lengths, (b) percent change in unit cell lengths compared to initial unreacted crystal, (c) changes in unit cell angles, and (d) changes in cell volume with percent conversion. Unit cell parameters for a single crystal that was reacted freely (no epoxy encapsulation) for 2 years and 77 days in a fridge at 10 °C (86.6% conversion) has also been included on plots (a) and (c).

## 2. Supplementary information associated with reacted crystal structures

Table S1 Crystallographic and refinement data for the solid-state reaction at room temperature.

| Identification code                         | 22ralb05_90C_DC49B_Fr<br>eezer_Glue_of                                         | 22ralb09_90C_DC49B_F<br>zGRT_6d7h_of                                           | 22ralb11_90C_DC49B_Fz<br>GRT_12d9h_of                                          | 22ralb14_90C_DC49B_Fz<br>GRT_22d2h_of                                          | 22ralb16_90C_DC49B_Fz<br>GRT_27d19h_of                                         | 22ralb17_90C_DC49B_Fz<br>GRT_32d11h_of                                         | 22ralb18_90C_DC49B_Fz<br>GRT_39d14h_of                                         |
|---------------------------------------------|--------------------------------------------------------------------------------|--------------------------------------------------------------------------------|--------------------------------------------------------------------------------|--------------------------------------------------------------------------------|--------------------------------------------------------------------------------|--------------------------------------------------------------------------------|--------------------------------------------------------------------------------|
| Time reacted<br>(Conversion)                | 0 h<br>(2.0 %)                                                                 | 6d 7h<br>(12.8 %)                                                              | 12d 9h<br>(20.0 %)                                                             | 22d 2h<br>(29.9 %)                                                             | 27d 19h<br>(33.4 %)                                                            | 32d 11h<br>(36.0 %)                                                            | 39d 14h<br>(39.0 %)                                                            |
| Empirical formula                           | C <sub>30</sub> H <sub>23</sub> BrN <sub>2</sub> O <sub>4</sub> S <sub>2</sub> | C <sub>30</sub> H <sub>23</sub> BrN <sub>2</sub> O <sub>4</sub> S <sub>2</sub> | C <sub>30</sub> H <sub>23</sub> BrN <sub>2</sub> O <sub>4</sub> S <sub>2</sub> | C <sub>30</sub> H <sub>23</sub> BrN <sub>2</sub> O <sub>4</sub> S <sub>2</sub> | C <sub>30</sub> H <sub>23</sub> BrN <sub>2</sub> O <sub>4</sub> S <sub>2</sub> | C <sub>30</sub> H <sub>23</sub> BrN <sub>2</sub> O <sub>4</sub> S <sub>2</sub> | C <sub>30</sub> H <sub>23</sub> BrN <sub>2</sub> O <sub>4</sub> S <sub>2</sub> |
| Formula weight                              | 619.53                                                                         | 619.53                                                                         | 619.53                                                                         | 619.53                                                                         | 619.53                                                                         | 309.77                                                                         | 619.53                                                                         |
| Temperature/K                               | 173.15                                                                         | 173.15                                                                         | 173.15                                                                         | 173.15                                                                         | 173.15                                                                         | 173.15                                                                         | 173.15                                                                         |
| Crystal system                              | triclinic                                                                      |
| Space group                                 | <i>P</i> -1                                                                    |
| a/Å                                         | 11.4827(5)                                                                     | 11.4667(6)                                                                     | 11.4616(6)                                                                     | 11.4528(6)                                                                     | 11.4482(6)                                                                     | 11.4457(6)                                                                     | 11.4464(6)                                                                     |
| b/Å                                         | 11.9111(5)                                                                     | 11.9120(6)                                                                     | 11.9174(6)                                                                     | 11.9126(6)                                                                     | 11.9046(6)                                                                     | 11.9037(6)                                                                     | 11.9005(7)                                                                     |
| c/Å                                         | 11.9382(5)                                                                     | 11.9462(6)                                                                     | 11.9565(6)                                                                     | 11.9707(6)                                                                     | 11.9797(6)                                                                     | 11.9878(6)                                                                     | 12.0001(7)                                                                     |
| α/°                                         | 63.532(2)                                                                      | 63.912(2)                                                                      | 64.094(2)                                                                      | 64.230(2)                                                                      | 64.297(2)                                                                      | 64.330(2)                                                                      | 64.352(2)                                                                      |
| β/°                                         | 78.453(2)                                                                      | 78.782(2)                                                                      | 78.975(2)                                                                      | 79.138(2)                                                                      | 79.211(2)                                                                      | 79.237(2)                                                                      | 79.266(2)                                                                      |
| γ/°                                         | 62.107(2)                                                                      | 62.114(2)                                                                      | 62.088(2)                                                                      | 62.067(2)                                                                      | 62.040(2)                                                                      | 62.027(2)                                                                      | 62.005(2)                                                                      |
| Volume/Å <sup>3</sup>                       | 1291.78(10)                                                                    | 1295.20(12)                                                                    | 1297.97(12)                                                                    | 1299.18(12)                                                                    | 1299.14(12)                                                                    | 1299.83(12)                                                                    | 1300.85(13)                                                                    |
| Z                                           | 2                                                                              | 2                                                                              | 2                                                                              | 2                                                                              | 2                                                                              | 4                                                                              | 2                                                                              |
| ρcal/cm <sup>3</sup>                        | 1.593                                                                          | 1.589                                                                          | 1.585                                                                          | 1.584                                                                          | 1.584                                                                          | 1.583                                                                          | 1.582                                                                          |
| μ/mm <sup>-1</sup>                          | 1.795                                                                          | 1.79                                                                           | 1.786                                                                          | 1.785                                                                          | 1.785                                                                          | 1.784                                                                          | 1.782                                                                          |
| F(000)                                      | 632                                                                            | 632                                                                            | 632                                                                            | 632                                                                            | 632                                                                            | 632                                                                            | 632                                                                            |
| Crystal size/mm <sup>3</sup>                | 0.289 × 0.09 × 0.076                                                           | 0.319 × 0.288 × 0.21                                                           | 0.322 × 0.08 × 0.065                                                           | 0.305 × 0.079 × 0.078                                                          | 0.297 × 0.08 × 0.076                                                           | 0.283 × 0.08 × 0.072                                                           | 0.297 × 0.082 × 0.064                                                          |
| Radiation                                   | MoKα<br>(λ = 0.71073)                                                          |
| 2θ range for data collection/°              | 3.812 to 56.69                                                                 | 3.796 to 55                                                                    | 3.788 to 56.64                                                                 | 3.778 to 56.654                                                                | 4.028 to 56.662                                                                | 3.77 to 56.7                                                                   | 3.766 to 56.76                                                                 |
| Index ranges                                | -15 ≤ h ≤ 15, -15 ≤ k ≤ 15, -15 ≤ l ≤ 15                                       | -14 ≤ h ≤ 14, -15 ≤ k ≤ 15, -15 ≤ l ≤ 15                                       | -15 ≤ h ≤ 15, -15 ≤ k ≤ 15, -15 ≤ l ≤ 15                                       | -15 ≤ h ≤ 15, -15 ≤ k ≤ 15, -15 ≤ l ≤ 15                                       | -15 ≤ h ≤ 15, -15 ≤ k ≤ 15, -15 ≤ l ≤ 15                                       | -15 ≤ h ≤ 15, -15 ≤ k ≤ 15, -16 ≤ l ≤ 16                                       | -15 ≤ h ≤ 15, -15 ≤ k ≤ 15, -16 ≤ l ≤ 16                                       |
| Reflections collected                       | 55192                                                                          | 66091                                                                          | 49988                                                                          | 76415                                                                          | 57104                                                                          | 54540                                                                          | 55707                                                                          |
| Independent reflections                     | 6382 [Rint = 0.0460, Rsigma = 0.0286]                                          | 5941 [Rint = 0.0482, Rsigma = 0.0269]                                          | 6432 [Rint = 0.0600, Rsigma = 0.0355]                                          | 6440 [Rint = 0.0682, Rsigma = 0.0314]                                          | 6442 [Rint = 0.0642, Rsigma = 0.0336]                                          | 6449 [Rint = 0.0611, Rsigma = 0.0332]                                          | 6461 [Rint = 0.0676, Rsigma = 0.0354]                                          |
| Data/restraints/parameters                  | 6382/2/378                                                                     | 5941/2/378                                                                     | 6432/2/377                                                                     | 6440/1090/701                                                                  | 6442/1061/700                                                                  | 6449/1093/716                                                                  | 6461/1093/716                                                                  |
| Goodness-of-fit on F <sup>2</sup>           | 1.106                                                                          | 1.068                                                                          | 1.115                                                                          | 1.185                                                                          | 1.135                                                                          | 1.146                                                                          | 1.141                                                                          |
| Final R indexes [I>=2σ(I)]                  | R1 = 0.0434, wR2 = 0.1425                                                      | R1 = 0.0535, wR2 = 0.1561                                                      | R1 = 0.0693, wR2 = 0.1928                                                      | R1 = 0.0640, wR2 = 0.1768                                                      | R1 = 0.0651, wR2 = 0.1893                                                      | R1 = 0.0677, wR2 = 0.2016                                                      | R1 = 0.0709, wR2 = 0.2071                                                      |
| Final R indexes [all data]                  | R1 = 0.0455, wR2 = 0.1439                                                      | R1 = 0.0575, wR2 = 0.1588                                                      | R1 = 0.0816, wR2 = 0.2008                                                      | R1 = 0.0776, wR2 = 0.1853                                                      | R1 = 0.0788, wR2 = 0.1992                                                      | R1 = 0.0831, wR2 = 0.2158                                                      | R1 = 0.0867, wR2 = 0.2185                                                      |
| Largest diff. peak/hole / e Å <sup>-3</sup> | 1.20/-0.43                                                                     | 1.00/-0.58                                                                     | 1.21/-0.69                                                                     | 0.91/-0.54                                                                     | 0.98/-0.51                                                                     | 0.99/-0.47                                                                     | 1.04/-0.50                                                                     |

Table S1 Continued.

|                                             |                                                                                |                                                                                |                                                                                |                                                                                |                                                                                |                                                                                |                                                                                |
|---------------------------------------------|--------------------------------------------------------------------------------|--------------------------------------------------------------------------------|--------------------------------------------------------------------------------|--------------------------------------------------------------------------------|--------------------------------------------------------------------------------|--------------------------------------------------------------------------------|--------------------------------------------------------------------------------|
| Identification code                         | 22a1b19_90C_DC49B_Fz<br>GRT_46d6h_of                                           | 22a1b22_90C_DC49B_Fz<br>GRT_52d21h_of                                          | 22a1b24_90C_DC49B_Fz<br>GRT_59d_12h_of                                         | 22a1b29_90C_DC49B_Fz<br>GRT_66d3h_of                                           | 22a1b30_90C_DC49B_Fz<br>GRT_72d19h_of                                          | 22a1b31_90C_DC49B_Fz<br>GRT_78d20h_of                                          | 22a1b32_90C_DC49B_Fz<br>GRT_85d23h_of                                          |
| Time reacted (Conversion)                   | 46d 6h<br>(41.3 %)                                                             | 52d 21h<br>(43.6 %)                                                            | 59d 12h<br>(46.2 %)                                                            | 66d 3h<br>(48.4 %)                                                             | 72d 19h<br>(50.6 %)                                                            | 78d 20h<br>(53.4 %)                                                            | 85d 23h<br>(56.4 %)                                                            |
| Empirical formula                           | C <sub>30</sub> H <sub>23</sub> BrN <sub>2</sub> O <sub>4</sub> S <sub>2</sub> | C <sub>30</sub> H <sub>23</sub> BrN <sub>2</sub> O <sub>4</sub> S <sub>2</sub> | C <sub>30</sub> H <sub>23</sub> BrN <sub>2</sub> O <sub>4</sub> S <sub>2</sub> | C <sub>30</sub> H <sub>23</sub> BrN <sub>2</sub> O <sub>4</sub> S <sub>2</sub> | C <sub>30</sub> H <sub>23</sub> BrN <sub>2</sub> O <sub>4</sub> S <sub>2</sub> | C <sub>30</sub> H <sub>23</sub> BrN <sub>2</sub> O <sub>4</sub> S <sub>2</sub> | C <sub>30</sub> H <sub>23</sub> BrN <sub>2</sub> O <sub>4</sub> S <sub>2</sub> |
| Formula weight                              | 309.77                                                                         | 619.53                                                                         | 619.53                                                                         | 619.53                                                                         | 619.53                                                                         | 619.53                                                                         | 619.53                                                                         |
| Temperature/K                               | 173.15                                                                         | 173.15                                                                         | 173.15                                                                         | 173.15                                                                         | 173.15                                                                         | 173.15                                                                         | 173.15                                                                         |
| Crystal system                              | triclinic                                                                      |
| Space group                                 | P-1                                                                            |
| a/Å                                         | 11.4476(6)                                                                     | 11.4477(7)                                                                     | 11.4476(7)                                                                     | 11.4534(8)                                                                     | 11.4561(8)                                                                     | 11.4623(7)                                                                     | 11.4723(8)                                                                     |
| b/Å                                         | 11.9000(7)                                                                     | 11.8940(7)                                                                     | 11.8865(7)                                                                     | 11.8830(9)                                                                     | 11.8710(8)                                                                     | 11.8581(7)                                                                     | 11.8443(8)                                                                     |
| c/Å                                         | 12.0147(7)                                                                     | 12.0324(7)                                                                     | 12.0495(7)                                                                     | 12.0758(8)                                                                     | 12.0961(8)                                                                     | 12.1246(7)                                                                     | 12.1622(8)                                                                     |
| α/°                                         | 64.330(2)                                                                      | 64.336(2)                                                                      | 64.292(2)                                                                      | 64.240(2)                                                                      | 64.184(2)                                                                      | 64.105(2)                                                                      | 63.971(3)                                                                      |
| β/°                                         | 79.260(2)                                                                      | 79.235(2)                                                                      | 79.202(2)                                                                      | 79.120(3)                                                                      | 79.051(2)                                                                      | 78.968(2)                                                                      | 78.820(3)                                                                      |
| γ/°                                         | 61.983(2)                                                                      | 61.976(2)                                                                      | 61.928(2)                                                                      | 61.892(2)                                                                      | 61.856(2)                                                                      | 61.809(2)                                                                      | 61.688(3)                                                                      |
| Volume/Å <sup>3</sup>                       | 1302.00(13)                                                                    | 1303.27(14)                                                                    | 1303.22(14)                                                                    | 1305.36(16)                                                                    | 1305.50(16)                                                                    | 1306.43(14)                                                                    | 1307.15(16)                                                                    |
| Z                                           | 4                                                                              | 2                                                                              | 2                                                                              | 2                                                                              | 2                                                                              | 2                                                                              | 2                                                                              |
| ρ <sub>calc</sub> /cm <sup>3</sup>          | 1.58                                                                           | 1.579                                                                          | 1.579                                                                          | 1.576                                                                          | 1.576                                                                          | 1.575                                                                          | 1.574                                                                          |
| μ/mm-1                                      | 1.781                                                                          | 1.779                                                                          | 1.779                                                                          | 1.776                                                                          | 1.776                                                                          | 1.775                                                                          | 1.774                                                                          |
| F(000)                                      | 632                                                                            | 632                                                                            | 632                                                                            | 632                                                                            | 632                                                                            | 632                                                                            | 632                                                                            |
| Crystal size/mm <sup>3</sup>                | 0.279 × 0.078 × 0.074                                                          | 0.293 × 0.076 × 0.072                                                          | 0.319 × 0.075 × 0.072                                                          | 0.312 × 0.083 × 0.062                                                          | 0.191 × 0.142 × 0.057                                                          | 0.191 × 0.142 × 0.057                                                          | 0.278 × 0.077 × 0.074                                                          |
| Radiation                                   | MoKα<br>(λ = 0.71073)                                                          |
| 2θ range for data collection/°              | 3.762 to 56.818                                                                | 3.756 to 56.71                                                                 | 3.752 to 56.73                                                                 | 4.032 to 56.656                                                                | 3.742 to 56.696                                                                | 3.734 to 56.822                                                                | 4.034 to 53.998                                                                |
| Index ranges                                | -15 ≤ h ≤ 15, -15 ≤ k ≤ 15, -16 ≤ l ≤ 16                                       | -15 ≤ h ≤ 15, -15 ≤ k ≤ 15, -16 ≤ l ≤ 16                                       | -15 ≤ h ≤ 15, -15 ≤ k ≤ 15, -16 ≤ l ≤ 16                                       | -15 ≤ h ≤ 15, -15 ≤ k ≤ 15, -16 ≤ l ≤ 16                                       | -15 ≤ h ≤ 15, -15 ≤ k ≤ 15, -16 ≤ l ≤ 16                                       | -15 ≤ h ≤ 15, -15 ≤ k ≤ 15, -16 ≤ l ≤ 16                                       | -14 ≤ h ≤ 14, -15 ≤ k ≤ 15, -15 ≤ l ≤ 15                                       |
| Reflections collected                       | 53281                                                                          | 77550                                                                          | 59062                                                                          | 52122                                                                          | 74409                                                                          | 59993                                                                          | 49387                                                                          |
| Independent reflections                     | 6479 [Rint = 0.0661, Rsigma = 0.0356]                                          | 6471 [Rint = 0.0778, Rsigma = 0.0357]                                          | 6468 [Rint = 0.0776, Rsigma = 0.0404]                                          | 6463 [Rint = 0.0809, Rsigma = 0.0479]                                          | 6477 [Rint = 0.0718, Rsigma = 0.0615]                                          | 6527 [Rint = 0.0723, Rsigma = 0.0638]                                          | 5700 [Rint = 0.0731, Rsigma = 0.0710]                                          |
| Data/restraints/parameters                  | 6479/1087/716                                                                  | 6471/1093/716                                                                  | 6468/1093/716                                                                  | 6463/1087/716                                                                  | 6477/1122/721                                                                  | 6527/1116/721                                                                  | 5700/1113/716                                                                  |
| Goodness-of-fit on F <sup>2</sup>           | 1.144                                                                          | 1.145                                                                          | 1.129                                                                          | 1.102                                                                          | 1.083                                                                          | 1.073                                                                          | 1.687                                                                          |
| Final R indexes [I > 2σ (I)]                | R1 = 0.0790, wR2 = 0.2191                                                      | R1 = 0.0803, wR2 = 0.2195                                                      | R1 = 0.0850, wR2 = 0.2377                                                      | R1 = 0.0913, wR2 = 0.2546                                                      | R1 = 0.0968, wR2 = 0.2762                                                      | R1 = 0.1074, wR2 = 0.3036                                                      | R1 = 0.1182, wR2 = 0.3764                                                      |
| Final R indexes [all data]                  | R1 = 0.0942, wR2 = 0.2289                                                      | R1 = 0.1010, wR2 = 0.2348                                                      | R1 = 0.1106, wR2 = 0.2586                                                      | R1 = 0.1205, wR2 = 0.2789                                                      | R1 = 0.1161, wR2 = 0.2952                                                      | R1 = 0.1351, wR2 = 0.3318                                                      | R1 = 0.1450, wR2 = 0.4042                                                      |
| Largest diff. peak/hole / e Å <sup>-3</sup> | 1.08/-0.46                                                                     | 1.07/-0.55                                                                     | 1.03/-0.55                                                                     | 1.06/-0.67                                                                     | 1.14/-0.68                                                                     | 1.08/-0.86                                                                     | 1.22/-0.81                                                                     |

Table S1 Continued.

|                                                              |                                                                                |                                                                                |                                                                                |                                                                                |                                                                                |                                                                                |                                                                                |
|--------------------------------------------------------------|--------------------------------------------------------------------------------|--------------------------------------------------------------------------------|--------------------------------------------------------------------------------|--------------------------------------------------------------------------------|--------------------------------------------------------------------------------|--------------------------------------------------------------------------------|--------------------------------------------------------------------------------|
| Identification code                                          | 22a1b33_90C_DC49B_Fz<br>GRT_91d_0f                                             | 22a1b35_90C_DC49B_Fz<br>GRT_103d4h_0f                                          | 22a1b36_90C_DC49B_Fz<br>GRT_133d5h_0f_1                                        | 22a1b37_90C_DC49B_Fz<br>GRT_138d2h_c2c_0f                                      | 22a1b39_90C_DC49B_Fz<br>GRT_144d1h_monoc_0f                                    | 22a1b40_90C_DC49B_Fz<br>GRT_153d_0f                                            | 22a1b41_90C_DC49B_Fz<br>GRT_156d7h_mono_0f                                     |
| Time reacted (Conversion)                                    | 91d 0h<br>(57.3 %)                                                             | 103d 4h<br>(63.6 %)                                                            | 133d 5h<br>(79.0 %)                                                            | 138d 2h<br>(79.8 %)                                                            | 144d 1h<br>(81.4 %)                                                            | 153d 0h<br>(81.6 %)                                                            | 156d 7h<br>(83.6 %)                                                            |
| Empirical formula                                            | C <sub>30</sub> H <sub>23</sub> BrN <sub>2</sub> O <sub>4</sub> S <sub>2</sub> | C <sub>30</sub> H <sub>23</sub> BrN <sub>2</sub> O <sub>4</sub> S <sub>2</sub> | C <sub>30</sub> H <sub>23</sub> BrN <sub>2</sub> O <sub>4</sub> S <sub>2</sub> | C <sub>30</sub> H <sub>23</sub> BrN <sub>2</sub> O <sub>4</sub> S <sub>2</sub> | C <sub>30</sub> H <sub>23</sub> BrN <sub>2</sub> O <sub>4</sub> S <sub>2</sub> | C <sub>30</sub> H <sub>23</sub> BrN <sub>2</sub> O <sub>4</sub> S <sub>2</sub> | C <sub>30</sub> H <sub>23</sub> BrN <sub>2</sub> O <sub>4</sub> S <sub>2</sub> |
| Formula weight                                               | 619.53                                                                         | 619.53                                                                         | 619.53                                                                         | 619.53                                                                         | 619.53                                                                         | 619.53                                                                         | 619.53                                                                         |
| Temperature/K                                                | 173.15                                                                         | 173.15                                                                         | 173                                                                            | 173                                                                            | 173                                                                            | 173                                                                            | 173                                                                            |
| Crystal system                                               | triclinic                                                                      | triclinic                                                                      | monoclinic                                                                     | monoclinic                                                                     | monoclinic                                                                     | monoclinic                                                                     | monoclinic                                                                     |
| Space group                                                  | <i>P</i> -1                                                                    | <i>P</i> -1                                                                    | <i>C</i> 2/ <i>c</i>                                                           |
| <i>a</i> /Å                                                  | 11.4850(8)                                                                     | 11.5260(10)                                                                    | 20.1661(11)                                                                    | 20.1678(16)                                                                    | 20.1614(14)                                                                    | 20.1992(11)                                                                    | 20.2248(11)                                                                    |
| <i>b</i> /Å                                                  | 11.8448(8)                                                                     | 11.8060(11)                                                                    | 11.7540(11)                                                                    | 11.7525(16)                                                                    | 11.7473(14)                                                                    | 11.7561(11)                                                                    | 11.7573(11)                                                                    |
| <i>c</i> /Å                                                  | 12.1888(8)                                                                     | 12.2903(11)                                                                    | 14.9001(12)                                                                    | 14.9159(17)                                                                    | 14.9224(14)                                                                    | 14.9433(12)                                                                    | 14.9500(12)                                                                    |
| $\alpha$ /°                                                  | 63.868(3)                                                                      | 63.453(4)                                                                      | 90                                                                             | 90                                                                             | 90                                                                             | 90                                                                             | 90                                                                             |
| $\beta$ /°                                                   | 78.672(3)                                                                      | 78.220(4)                                                                      | 131.943(5)                                                                     | 131.937(7)                                                                     | 131.925(6)                                                                     | 131.896(6)                                                                     | 131.928(6)                                                                     |
| $\gamma$ /°                                                  | 61.607(3)                                                                      | 61.190(3)                                                                      | 90                                                                             | 90                                                                             | 90                                                                             | 90                                                                             | 90                                                                             |
| Volume/Å <sup>3</sup>                                        | 1309.39(16)                                                                    | 1310.8(2)                                                                      | 2627.0(4)                                                                      | 2629.9(6)                                                                      | 2629.6(5)                                                                      | 2641.3(4)                                                                      | 2644.8(4)                                                                      |
| <i>Z</i>                                                     | 2                                                                              | 2                                                                              | 4                                                                              | 4                                                                              | 4                                                                              | 4                                                                              | 4                                                                              |
| $\rho$ calc/gcm <sup>3</sup>                                 | 1.571                                                                          | 1.57                                                                           | 1.566                                                                          | 1.565                                                                          | 1.565                                                                          | 1.558                                                                          | 1.556                                                                          |
| $\mu$ /mm <sup>-1</sup>                                      | 1.771                                                                          | 1.769                                                                          | 1.765                                                                          | 1.763                                                                          | 1.763                                                                          | 3.94                                                                           | 3.934                                                                          |
| <i>F</i> (000)                                               | 632                                                                            | 632                                                                            | 1264                                                                           | 1264                                                                           | 1264                                                                           | 1264                                                                           | 1264                                                                           |
| Crystal size/mm <sup>3</sup>                                 | 0.288 × 0.075 × 0.072                                                          | 0.273 × 0.093 × 0.065                                                          | 0.286 × 0.078 × 0.074                                                          | 0.281 × 0.071 × 0.066                                                          | 0.286 × 0.059 × 0.055                                                          | 0.29 × 0.076 × 0.075                                                           | 0.304 × 0.076 × 0.069                                                          |
| Radiation                                                    | MoK $\alpha$<br>( $\lambda$ = 0.71073)                                         | CuK $\alpha$<br>( $\lambda$ = 1.54178)                                         | CuK $\alpha$<br>( $\lambda$ = 1.54178)                                         |
| 2 $\theta$ range for data collection/°                       | 3.722 to 53.994                                                                | 3.704 to 49.998                                                                | 4.402 to 49.986                                                                | 4.402 to 49.992                                                                | 4.404 to 49.988                                                                | 9.55 to 131.534                                                                | 9.546 to 131.184                                                               |
| Index ranges                                                 | -14 ≤ <i>h</i> ≤ 14, -15 ≤ <i>k</i> ≤ 15, -15 ≤ <i>l</i> ≤ 15                  | -13 ≤ <i>h</i> ≤ 13, -14 ≤ <i>k</i> ≤ 14, -14 ≤ <i>l</i> ≤ 14                  | -23 ≤ <i>h</i> ≤ 23, -13 ≤ <i>k</i> ≤ 13, -17 ≤ <i>l</i> ≤ 17                  | -23 ≤ <i>h</i> ≤ 23, -13 ≤ <i>k</i> ≤ 13, -17 ≤ <i>l</i> ≤ 17                  | -23 ≤ <i>h</i> ≤ 23, -13 ≤ <i>k</i> ≤ 13, -17 ≤ <i>l</i> ≤ 17                  | -23 ≤ <i>h</i> ≤ 23, -13 ≤ <i>k</i> ≤ 13, -17 ≤ <i>l</i> ≤ 17                  | -23 ≤ <i>h</i> ≤ 23, -13 ≤ <i>k</i> ≤ 13, -17 ≤ <i>l</i> ≤ 17                  |
| Reflections collected                                        | 49987                                                                          | 40827                                                                          | 52117                                                                          | 52818                                                                          | 46341                                                                          | 34736                                                                          | 35750                                                                          |
| Independent reflections                                      | 5705 [Rint = 0.0716, Rsigma = 0.0541]                                          | 4609 [Rint = 0.0681, Rsigma = 0.0437]                                          | 2305 [Rint = 0.1477, Rsigma = 0.0401]                                          | 2307 [Rint = 0.1745, Rsigma = 0.0466]                                          | 2304 [Rint = 0.1512, Rsigma = 0.0428]                                          | 2280 [Rint = 0.1223, Rsigma = 0.0448]                                          | 2278 [Rint = 0.1261, Rsigma = 0.0446]                                          |
| Data/restraints/parameters                                   | 5705/1122/721                                                                  | 4609/1122/709                                                                  | 2305/709/343                                                                   | 2307/709/343                                                                   | 2304/709/343                                                                   | 2280/714/348                                                                   | 2278/714/348                                                                   |
| Goodness-of-fit on <i>F</i> <sup>2</sup>                     | 1.75                                                                           | 1.913                                                                          | 1.119                                                                          | 1.128                                                                          | 1.081                                                                          | 1.057                                                                          | 1.63                                                                           |
| Final <i>R</i> indexes [ <i>I</i> > 2 $\sigma$ ( <i>I</i> )] | <i>R</i> 1 = 0.1232, <i>wR</i> 2 = 0.3847                                      | <i>R</i> 1 = 0.1331, <i>wR</i> 2 = 0.4123                                      | <i>R</i> 1 = 0.1083, <i>wR</i> 2 = 0.2905                                      | <i>R</i> 1 = 0.1215, <i>wR</i> 2 = 0.2906                                      | <i>R</i> 1 = 0.1124, <i>wR</i> 2 = 0.2778                                      | <i>R</i> 1 = 0.1099, <i>wR</i> 2 = 0.2934                                      | <i>R</i> 1 = 0.1410, <i>wR</i> 2 = 0.3797                                      |
| Final <i>R</i> indexes [all data]                            | <i>R</i> 1 = 0.1508, <i>wR</i> 2 = 0.4140                                      | <i>R</i> 1 = 0.1635, <i>wR</i> 2 = 0.4426                                      | <i>R</i> 1 = 0.1316, <i>wR</i> 2 = 0.3158                                      | <i>R</i> 1 = 0.1682, <i>wR</i> 2 = 0.3412                                      | <i>R</i> 1 = 0.1604, <i>wR</i> 2 = 0.3299                                      | <i>R</i> 1 = 0.1588, <i>wR</i> 2 = 0.3475                                      | <i>R</i> 1 = 0.2017, <i>wR</i> 2 = 0.4432                                      |
| Largest diff. peak/hole / e Å <sup>-3</sup>                  | 1.30/-0.78                                                                     | 0.84/-0.75                                                                     | 0.83/-0.43                                                                     | 0.93/-0.37                                                                     | 0.85/-0.36                                                                     | 0.83/-0.34                                                                     | 0.97/-0.34                                                                     |

Table S1 Continued.

| Identification code                            | 22ra1b42_90C_DC49B_Fz<br>GRT_162d8h_c2c_0f                                     | 22ra1b43_90C_DC49B_Fz<br>GRT_168d6h_c2c_0f                                     | 22ra1b46_90C_DC49B_Fz<br>GRT_186d20h_mono_0f                                   |
|------------------------------------------------|--------------------------------------------------------------------------------|--------------------------------------------------------------------------------|--------------------------------------------------------------------------------|
| Time reacted<br>(Conversion)                   | 162d 8h<br>(82.6 %)                                                            | 168d 6h<br>(88.2 %)                                                            | 186d 20h<br>(89.2 %)                                                           |
| Empirical formula                              | C <sub>30</sub> H <sub>23</sub> BrN <sub>2</sub> O <sub>4</sub> S <sub>2</sub> | C <sub>30</sub> H <sub>23</sub> BrN <sub>2</sub> O <sub>4</sub> S <sub>2</sub> | C <sub>30</sub> H <sub>23</sub> BrN <sub>2</sub> O <sub>4</sub> S <sub>2</sub> |
| Formula weight                                 | 619.53                                                                         | 619.53                                                                         | 619.53                                                                         |
| Temperature/K                                  | 173                                                                            | 173                                                                            | 173                                                                            |
| Crystal system                                 | monoclinic                                                                     | monoclinic                                                                     | monoclinic                                                                     |
| Space group                                    | C2/c                                                                           | C2/c                                                                           | C2/c                                                                           |
| a/Å                                            | 20.2382(10)                                                                    | 20.261(2)                                                                      | 20.2158(9)                                                                     |
| b/Å                                            | 11.7565(10)                                                                    | 11.7713(12)                                                                    | 11.7554(9)                                                                     |
| c/Å                                            | 14.9692(10)                                                                    | 15.002(3)                                                                      | 14.9649(9)                                                                     |
| α/°                                            | 90                                                                             | 90                                                                             | 90                                                                             |
| β/°                                            | 131.914(5)                                                                     | 131.889(5)                                                                     | 131.738(6)                                                                     |
| γ/°                                            | 90                                                                             | 90                                                                             | 90                                                                             |
| Volume/Å <sup>3</sup>                          | 2650.4(4)                                                                      | 2663.5(7)                                                                      | 2653.7(3)                                                                      |
| Z                                              | 4                                                                              | 4                                                                              | 4                                                                              |
| ρ <sub>calc</sub> /cm <sup>3</sup>             | 1.553                                                                          | 1.545                                                                          | 1.551                                                                          |
| μ/mm <sup>-1</sup>                             | 3.926                                                                          | 3.907                                                                          | 3.921                                                                          |
| F(000)                                         | 1264                                                                           | 1264                                                                           | 1264                                                                           |
| Crystal size/mm <sup>3</sup>                   | 0.325 × 0.087 ×<br>0.071                                                       | 0.309 × 0.076 ×<br>0.058                                                       | 0.328 × 0.081 ×<br>0.074                                                       |
| Radiation                                      | CuKα<br>(λ = 1.54178)                                                          | CuKα<br>(λ = 1.54178)                                                          | CuKα<br>(λ = 1.54178)                                                          |
| 2θ range for data<br>collection/°              | 9.544 to<br>133.988                                                            | 9.53 to 133.996                                                                | 9.538 to<br>118.534                                                            |
| Index ranges                                   | -24 ≤ h ≤ 24, -<br>13 ≤ k ≤ 14, -17<br>≤ l ≤ 17                                | -24 ≤ h ≤ 24, -<br>14 ≤ k ≤ 14, -17<br>≤ l ≤ 17                                | -22 ≤ h ≤ 22, -<br>13 ≤ k ≤ 13, -16<br>≤ l ≤ 16                                |
| Reflections<br>collected                       | 38113                                                                          | 30734                                                                          | 34235                                                                          |
| Independent<br>reflections                     | 2346 [Rint =<br>0.1096, Rsigma<br>= 0.0404]                                    | 2354 [Rint =<br>0.1439, Rsigma<br>= 0.0538]                                    | 1916 [Rint =<br>0.1820, Rsigma<br>= 0.0639]                                    |
| Data/restraints/par<br>ameters                 | 2346/714/348                                                                   | 2354/714/348                                                                   | 1916/714/348                                                                   |
| Goodness-of-fit<br>on F <sup>2</sup>           | 1.618                                                                          | 1.452                                                                          | 1.593                                                                          |
| Final R indexes<br>[I ≥ 2σ(I)]                 | R1 = 0.1378,<br>wR2 = 0.3763                                                   | R1 = 0.1648,<br>wR2 = 0.3852                                                   | R1 = 0.1899,<br>wR2 = 0.4059                                                   |
| Final R indexes<br>[all data]                  | R1 = 0.1877,<br>wR2 = 0.4337                                                   | R1 = 0.2660,<br>wR2 = 0.4627                                                   | R1 = 0.2881,<br>wR2 = 0.4778                                                   |
| Largest diff.<br>peak/hole / e Å <sup>-3</sup> | 1.02/-0.35                                                                     | 1.05/-0.44                                                                     | 0.94/-0.34                                                                     |

Table S2 Crystallographic and refinement data for the solid-state reaction at 40 °C.

| Identification code                                          | 21al_TAI16_TAI090C_<br>React_Fridge_0s                                         | 21al_TAI18_TAI090C_<br>RF_1d15h_0s                                             | 21al_TAI20_TAI090C_<br>RF_2d16h_0s                                             | 21al_TAI22_TAI090C_<br>RF_4d22h_0s                                             | 21al_TAI25_TAI090C_<br>RF_5d22h_0s                                             | 21al_TAI26_TAI090C_<br>RF_6d18h_0s                                             | 21al_TAI27_TAI090C_<br>RF_8d16h_0s                                             |
|--------------------------------------------------------------|--------------------------------------------------------------------------------|--------------------------------------------------------------------------------|--------------------------------------------------------------------------------|--------------------------------------------------------------------------------|--------------------------------------------------------------------------------|--------------------------------------------------------------------------------|--------------------------------------------------------------------------------|
| Time reacted (Conversion)                                    | 0 h (18.3 %)                                                                   | 1d 5h (31.6 %)                                                                 | 2d 16h (34.3 %)                                                                | 4d 22h (42.8 %)                                                                | 5d 22h (46.5 %)                                                                | 6d 18h (49.7 %)                                                                | 8d 16h (61.1 %)                                                                |
| Empirical formula                                            | C <sub>30</sub> H <sub>23</sub> BrN <sub>2</sub> O <sub>4</sub> S <sub>2</sub> | C <sub>30</sub> H <sub>23</sub> BrN <sub>2</sub> O <sub>4</sub> S <sub>2</sub> | C <sub>30</sub> H <sub>23</sub> BrN <sub>2</sub> O <sub>4</sub> S <sub>2</sub> | C <sub>30</sub> H <sub>23</sub> BrN <sub>2</sub> O <sub>4</sub> S <sub>2</sub> | C <sub>30</sub> H <sub>23</sub> BrN <sub>2</sub> O <sub>4</sub> S <sub>2</sub> | C <sub>30</sub> H <sub>23</sub> BrN <sub>2</sub> O <sub>4</sub> S <sub>2</sub> | C <sub>30</sub> H <sub>23</sub> BrN <sub>2</sub> O <sub>4</sub> S <sub>2</sub> |
| Formula weight                                               | 619.53                                                                         | 619.53                                                                         | 619.53                                                                         | 619.53                                                                         | 619.53                                                                         | 619.53                                                                         | 619.53                                                                         |
| Temperature/K                                                | 173.15                                                                         | 173.15                                                                         | 173.15                                                                         | 173.15                                                                         | 173.15                                                                         | 173.15                                                                         | 173.15                                                                         |
| Crystal system                                               | triclinic                                                                      |
| Space group                                                  | <i>P</i> -1                                                                    |
| <i>a</i> /Å                                                  | 11.4664(6)                                                                     | 11.4592(3)                                                                     | 11.4600(6)                                                                     | 11.4577(6)                                                                     | 11.4659(9)                                                                     | 11.4655(8)                                                                     | 11.5217(9)                                                                     |
| <i>b</i> /Å                                                  | 11.9345(6)                                                                     | 11.9307(3)                                                                     | 11.9251(6)                                                                     | 11.9051(7)                                                                     | 11.8945(11)                                                                    | 11.8783(9)                                                                     | 11.8519(10)                                                                    |
| <i>c</i> /Å                                                  | 11.9516(6)                                                                     | 11.9831(4)                                                                     | 11.9945(7)                                                                     | 12.0500(7)                                                                     | 12.0911(12)                                                                    | 12.1224(10)                                                                    | 12.2638(11)                                                                    |
| $\alpha$ /°                                                  | 64.124(2)                                                                      | 64.3521(17)                                                                    | 64.302(2)                                                                      | 64.269(3)                                                                      | 64.173(4)                                                                      | 64.074(4)                                                                      | 63.591(5)                                                                      |
| $\beta$ /°                                                   | 78.987(2)                                                                      | 79.2012(19)                                                                    | 79.216(3)                                                                      | 79.164(3)                                                                      | 79.075(4)                                                                      | 78.958(4)                                                                      | 78.447(6)                                                                      |
| $\gamma$ /°                                                  | 62.060(2)                                                                      | 61.9785(14)                                                                    | 61.968(2)                                                                      | 61.909(2)                                                                      | 61.881(3)                                                                      | 61.774(3)                                                                      | 61.432(5)                                                                      |
| Volume/Å <sup>3</sup>                                        | 1299.84(12)                                                                    | 1303.47(7)                                                                     | 1303.50(13)                                                                    | 1305.98(13)                                                                    | 1308.8(2)                                                                      | 1308.01(18)                                                                    | 1317.1(2)                                                                      |
| <i>Z</i>                                                     | 2                                                                              | 2                                                                              | 2                                                                              | 2                                                                              | 2                                                                              | 2                                                                              | 2                                                                              |
| $\rho$ calc/gcm <sup>3</sup>                                 | 1.593                                                                          | 1.578                                                                          | 1.585                                                                          | 1.575                                                                          | 1.572                                                                          | 1.573                                                                          | 1.562                                                                          |
| $\mu$ /mm <sup>-1</sup>                                      | 1.784                                                                          | 1.779                                                                          | 1.779                                                                          | 1.775                                                                          | 1.771                                                                          | 1.773                                                                          | 1.760                                                                          |
| <i>F</i> (000)                                               | 632                                                                            | 632                                                                            | 632                                                                            | 632                                                                            | 632                                                                            | 632                                                                            | 632                                                                            |
| Crystal size/mm <sup>3</sup>                                 | 0.319 × 0.288 × 0.21                                                           | 0.383 × 0.268 × 0.172                                                          | 0.363 × 0.275 × 0.134                                                          | 0.319 × 0.288 × 0.21                                                           | 0.319 × 0.288 × 0.21                                                           | 0.344 × 0.3 × 0.186                                                            | 0.363 × 0.299 × 0.142                                                          |
| Radiation                                                    | MoK $\alpha$ ( $\lambda$ = 0.71073)                                            |
| 2 $\theta$ range for data collection/°                       | 3.788 to 56.766                                                                | 3.772 to 55.996                                                                | 3.77 to 52.938                                                                 | 3.752 to 52.856                                                                | 3.744 to 50.07                                                                 | 3.736 to 50.078                                                                | 3.708 to 50                                                                    |
| Index ranges                                                 | -15 ≤ <i>h</i> ≤ 15, -15 ≤ <i>k</i> ≤ 15, -14 ≤ <i>l</i> ≤ 15                  | -15 ≤ <i>h</i> ≤ 15, -15 ≤ <i>k</i> ≤ 15, -15 ≤ <i>l</i> ≤ 15                  | -14 ≤ <i>h</i> ≤ 14, -14 ≤ <i>k</i> ≤ 14, -15 ≤ <i>l</i> ≤ 15                  | -14 ≤ <i>h</i> ≤ 14, -14 ≤ <i>k</i> ≤ 14, -14 ≤ <i>l</i> ≤ 15                  | -12 ≤ <i>h</i> ≤ 13, -14 ≤ <i>k</i> ≤ 14, -14 ≤ <i>l</i> ≤ 14                  | -10 ≤ <i>h</i> ≤ 13, -14 ≤ <i>k</i> ≤ 13, -14 ≤ <i>l</i> ≤ 14                  | -13 ≤ <i>h</i> ≤ 13, -14 ≤ <i>k</i> ≤ 14, -14 ≤ <i>l</i> ≤ 14                  |
| Reflections collected                                        | 17394                                                                          | 23336                                                                          | 16189                                                                          | 15185                                                                          | 8044                                                                           | 9196                                                                           | 13684                                                                          |
| Independent reflections                                      | 6458 [Rint = 0.0645, Rsigma = 0.0901]                                          | 6296 [Rint = 0.0765, Rsigma = 0.0908]                                          | 5353 [Rint = 0.0793, Rsigma = 0.0902]                                          | 5344 [Rint = 0.0790, Rsigma = 0.1037]                                          | 4529 [Rint = 0.0552, Rsigma = 0.1337]                                          | 4506 [Rint = 0.0718, Rsigma = 0.1366]                                          | 4636 [Rint = 0.1407, Rsigma = 0.2176]                                          |
| Data/restraints/parameters                                   | 6458/2/378                                                                     | 6296/1073/700                                                                  | 5353/1073/697                                                                  | 5344/1067/697                                                                  | 4529/1073/697                                                                  | 4506/1110/709                                                                  | 4636/1230/697                                                                  |
| Goodness-of-fit on <i>F</i> <sup>2</sup>                     | 0.884                                                                          | 0.904                                                                          | 0.980                                                                          | 0.966                                                                          | 0.947                                                                          | 0.961                                                                          | 0.933                                                                          |
| Final <i>R</i> indexes [ <i>I</i> > 2 $\sigma$ ( <i>I</i> )] | <i>R</i> 1 = 0.0503, <i>wR</i> 2 = 0.1125                                      | <i>R</i> 1 = 0.0479, <i>wR</i> 2 = 0.1062                                      | <i>R</i> 1 = 0.0559, <i>wR</i> 2 = 0.1414                                      | <i>R</i> 1 = 0.0642, <i>wR</i> 2 = 0.1680                                      | <i>R</i> 1 = 0.0736, <i>wR</i> 2 = 0.1838                                      | <i>R</i> 1 = 0.0765, <i>wR</i> 2 = 0.2017                                      | <i>R</i> 1 = 0.1091, <i>wR</i> 2 = 0.2948                                      |
| Final <i>R</i> indexes [all data]                            | <i>R</i> 1 = 0.0958, <i>wR</i> 2 = 0.1246                                      | <i>R</i> 1 = 0.1005, <i>wR</i> 2 = 0.1191                                      | <i>R</i> 1 = 0.0998, <i>wR</i> 2 = 0.1535                                      | <i>R</i> 1 = 0.1252, <i>wR</i> 2 = 0.1864                                      | <i>R</i> 1 = 0.1560, <i>wR</i> 2 = 0.2140                                      | <i>R</i> 1 = 0.1635, <i>wR</i> 2 = 0.2321                                      | <i>R</i> 1 = 0.2513, <i>wR</i> 2 = 0.3549                                      |
| Largest diff. peak/hole / e Å <sup>-3</sup>                  | 0.61/-0.42                                                                     | 0.64/-0.34                                                                     | 0.60/-0.33                                                                     | 0.67/-0.40                                                                     | 0.57/-0.44                                                                     | 0.58/-0.42                                                                     | 0.53/-0.47                                                                     |



Table S2 Continued.

| Identification code                                             | mo_21talv_TALv6_TAL10<br>90C_RF_9d16h_0s                                       | 21tal_TAL18_TAL090C_<br>RF_1d15h_0s                                            | 21talv_TALv8_TAL090C<br>RF_12d17hs                                             | 22talb03_90C_DIC49Br_<br>T3_Final_of                                           |
|-----------------------------------------------------------------|--------------------------------------------------------------------------------|--------------------------------------------------------------------------------|--------------------------------------------------------------------------------|--------------------------------------------------------------------------------|
| Time reacted<br>(Conversion)                                    | 9d 16h<br>(63.6 %)                                                             | 10d 20h<br>(66.6 %)                                                            | 12d 17h<br>(71.7 %)                                                            | 4d 22h<br>(88.4 %)                                                             |
| Empirical formula                                               | C <sub>30</sub> H <sub>23</sub> BrN <sub>2</sub> O <sub>4</sub> S <sub>2</sub> | C <sub>30</sub> H <sub>23</sub> BrN <sub>2</sub> O <sub>4</sub> S <sub>2</sub> | C <sub>30</sub> H <sub>23</sub> BrN <sub>2</sub> O <sub>4</sub> S <sub>2</sub> | C <sub>30</sub> H <sub>23</sub> BrN <sub>2</sub> O <sub>4</sub> S <sub>2</sub> |
| Formula weight                                                  | 619.53                                                                         | 619.53                                                                         | 619.53                                                                         | 619.53                                                                         |
| Temperature/K                                                   | 173.15                                                                         | 173.15                                                                         | 173.15                                                                         | 173.15                                                                         |
| Crystal system                                                  | triclinic                                                                      | triclinic                                                                      | triclinic                                                                      | monoclinic                                                                     |
| Space group                                                     | <i>P</i> -1                                                                    | <i>P</i> -1                                                                    | <i>P</i> -1                                                                    | <i>C</i> 2/ <i>c</i>                                                           |
| <i>a</i> /Å                                                     | 11.534(2)                                                                      | 11.568(2)                                                                      | 11.5975(19)                                                                    | 20.1182(19)                                                                    |
| <i>b</i> /Å                                                     | 11.814(2)                                                                      | 11.778(2)                                                                      | 11.758(2)                                                                      | 11.7417(11)                                                                    |
| <i>c</i> /Å                                                     | 12.309(2)                                                                      | 12.404(2)                                                                      | 12.483(2)                                                                      | 14.9309(14)                                                                    |
| $\alpha$ /°                                                     | 63.291(5)                                                                      | 62.950(5)                                                                      | 62.699(5)                                                                      | 90                                                                             |
| $\beta$ /°                                                      | 78.160(5)                                                                      | 77.807(6)                                                                      | 77.538(5)                                                                      | 131.630(4)                                                                     |
| $\gamma$ /°                                                     | 61.139(4)                                                                      | 60.720(5)                                                                      | 60.382(4)                                                                      | 90                                                                             |
| Volume/Å <sup>3</sup>                                           | 1312.1(4)                                                                      | 1312.8(4)                                                                      | 1314.8(4)                                                                      | 2636.3(4)                                                                      |
| <i>Z</i>                                                        | 2                                                                              | 2                                                                              | 2                                                                              | 4                                                                              |
| $\rho$ calg/cm <sup>3</sup>                                     | 1.568                                                                          | 1.567                                                                          | 1.564                                                                          | 1.561                                                                          |
| $\mu$ /mm <sup>-1</sup>                                         | 1.767                                                                          | 1.766                                                                          | 1.763                                                                          | 3.947                                                                          |
| <i>F</i> (000)                                                  | 632                                                                            | 632                                                                            | 632                                                                            | 1264                                                                           |
| Crystal size/mm <sup>3</sup>                                    | 0.423 × 0.263 ×<br>0.244                                                       | 0.397 × 0.296 ×<br>0.259                                                       | 0.363 × 0.275 ×<br>0.134                                                       | 0.4 × 0.352 ×<br>0.287                                                         |
| Radiation/Å                                                     | MoK $\alpha$<br>( $\lambda$ = 0.71073)                                         | MoK $\alpha$<br>( $\lambda$ = 0.71073)                                         | MoK $\alpha$<br>( $\lambda$ = 0.71073)                                         | CuK $\alpha$<br>( $\lambda$ = 1.54178)                                         |
| 2 $\Theta$ range for data<br>collection/°                       | 6.74 to 49.994                                                                 | 5.428 to 39.998                                                                | 5.422 to 49.998                                                                | 9.556 to 133.038                                                               |
| Index ranges                                                    | -13 ≤ <i>h</i> ≤ 13, -<br>14 ≤ <i>k</i> ≤ 14, -14<br>≤ <i>l</i> ≤ 14           | -11 ≤ <i>h</i> ≤ 11, -<br>11 ≤ <i>k</i> ≤ 11, -11<br>≤ <i>l</i> ≤ 11           | -13 ≤ <i>h</i> ≤ 13, -<br>13 ≤ <i>k</i> ≤ 13, -14<br>≤ <i>l</i> ≤ 14           | -23 ≤ <i>h</i> ≤ 23, -13<br>≤ <i>k</i> ≤ 13, -17 ≤ <i>l</i> ≤<br>17            |
| Reflections<br>collected                                        | 24992                                                                          | 31780                                                                          | 49215                                                                          | 23399                                                                          |
| Independent<br>reflections                                      | 4599 [Rint =<br>0.1150, Rsigma<br>= 0.0768]                                    | 2440 [Rint =<br>0.3193, Rsigma<br>= 0.1034]                                    | 4608 [Rint =<br>0.3530, Rsigma<br>= 0.1167]                                    | 2254 [Rint =<br>0.0764, Rsigma =<br>0.0401]                                    |
| Data/restraints/par<br>ameters                                  | 4599/1221/692                                                                  | 2440/1236/692                                                                  | 4608/1324/709                                                                  | 2254/701/355                                                                   |
| Goodness-of-fit<br>on <i>F</i> <sup>2</sup>                     | 1.740                                                                          | 2.116                                                                          | 1.684                                                                          | 1.114                                                                          |
| Final <i>R</i> indexes<br>[ <i>I</i> ≥ 2 $\sigma$ ( <i>I</i> )] | <i>R</i> 1 = 0.1612,<br><i>wR</i> 2 = 0.4402                                   | <i>R</i> 1 = 0.1536,<br><i>wR</i> 2 = 0.4312                                   | <i>R</i> 1 = 0.1930,<br><i>wR</i> 2 = 0.4435                                   | <i>R</i> 1 = 0.1238, <i>wR</i> 2<br>= 0.3284                                   |
| Final <i>R</i> indexes<br>[all data]                            | <i>R</i> 1 = 0.2334,<br><i>wR</i> 2 = 0.4806                                   | <i>R</i> 1 = 0.1993,<br><i>wR</i> 2 = 0.4718                                   | <i>R</i> 1 = 0.2981,<br><i>wR</i> 2 = 0.5038                                   | <i>R</i> 1 = 0.1580, <i>wR</i> 2<br>= 0.3687                                   |
| Largest diff.<br>peak/hole / e Å <sup>-3</sup>                  | 0.80/-0.70                                                                     | 1.11/-0.76                                                                     | 1.64/-0.76                                                                     | 1.07/-0.41                                                                     |

Table S3 Crystallographic and refinement data for a crystal that was reacted at 10 °C for 2 years and 77 days (86.6% conversion). The crystal data was first collected at 25 °C and then repeated at -100 °C.

|                                             |                                                         |                                                      |
|---------------------------------------------|---------------------------------------------------------|------------------------------------------------------|
| Identification code                         | 23talb01_90C_DC49B_NoGFr_2y_0f<br>Collected at 298.15 K | 23talb02_90C_DC49B_NoGFr_2y77f<br>Collected at 173 K |
| Empirical formula                           | $C_{30}H_{23}BrN_2O_4S_2$                               | $C_{30}H_{23}BrN_2O_4S_2$                            |
| Formula weight                              | 619.53                                                  | 619.53                                               |
| Temperature/K                               | 298.15                                                  | 173                                                  |
| Crystal system                              | Monoclinic                                              | Monoclinic                                           |
| Space group                                 | <i>C2/c</i>                                             | <i>C2/c</i>                                          |
| a/Å                                         | 20.168(3)                                               | 20.0690(16)                                          |
| b/Å                                         | 11.8017(16)                                             | 11.7091(9)                                           |
| c/Å                                         | 14.918(2)                                               | 14.9014(12)                                          |
| $\alpha$ /°                                 | 90                                                      | 90                                                   |
| $\beta$ /°                                  | 131.298(4)                                              | 131.712(2)                                           |
| $\gamma$ /°                                 | 90                                                      | 90                                                   |
| Volume/Å <sup>3</sup>                       | 2667.7(6)                                               | 2614.0(4)                                            |
| Z                                           | 4                                                       | 4                                                    |
| $\rho_{\text{calc}}/\text{cm}^3$            | 1.543                                                   | 1.574                                                |
| $\mu/\text{mm}^{-1}$                        | 1.738                                                   | 1.774                                                |
| F(000)                                      | 1264                                                    | 1264                                                 |
| Crystal size/mm <sup>3</sup>                | 0.487 × 0.161 × 0.138                                   | 0.487 × 0.161 × 0.138                                |
| Radiation                                   | MoK $\alpha$ ( $\lambda$ = 0.71073)                     | MoK $\alpha$ ( $\lambda$ = 0.71073)                  |
| 2 $\theta$ range for data collection/°      | 4.374 to 49.99                                          | 4.416 to 49.978                                      |
| Index ranges                                | -23 ≤ h ≤ 23, -14 ≤ k ≤ 14, -17 ≤ l ≤ 17                | -23 ≤ h ≤ 23, -13 ≤ k ≤ 13, -17 ≤ l ≤ 17             |
| Reflections collected                       | 58708                                                   | 34285                                                |
| Independent reflections                     | 2334 [Rint = 0.1237, Rsigma = 0.0411]                   | 2295 [Rint = 0.0890, Rsigma = 0.0486]                |
| Data/restraints/parameters                  | 2334/709/343                                            | 2295/709/343                                         |
| Goodness-of-fit on F <sup>2</sup>           | 1.138                                                   | 1.095                                                |
| Final R indexes [I > 2 $\sigma$ (I)]        | R1 = 0.0963, wR2 = 0.2621                               | R1 = 0.1024, wR2 = 0.2696                            |
| Final R indexes [all data]                  | R1 = 0.1263, wR2 = 0.3012                               | R1 = 0.1245, wR2 = 0.3015                            |
| Largest diff. peak/hole / e Å <sup>-3</sup> | 0.85/-0.40                                              | 1.16/-0.54                                           |
